# Characterization of the transcriptome, nucleotide sequence polymorphism, and natural selection in the desert adapted mouse *Peromyscus eremicus*

Matthew D. MacManes<sup>1</sup>, Michael B. Eisen<sup>2</sup>

<sup>1</sup> Department of Molecular, Cellular and Biomedical Sciences, University of New Hampshire, Durham NH, USA

<sup>2</sup> HHMI and University of California, Berkeley, Berkeley, CA, USA

\* E-mail: macmanes@gmail.com, @PeroMHC

## 1 Abstract

2 As a direct result of intense heat and aridity, deserts are thought to be among the most  
3 harsh of environments, particularly for their mammalian inhabitants. Given that os-  
4 moregulation can be challenging for these animals, with failure resulting in death, strong  
5 selection should be observed on genes related to the maintenance of water and solute  
6 balance. One such animal, *Peromyscus eremicus*, is native to the desert regions of the  
7 southwest United States and may live its entire life without oral fluid intake. As a first  
8 step toward understanding the genetics that underlie this phenotype, we present a char-  
9 acterization of the *P. eremicus* transcriptome. We assay four tissues (kidney, liver, brain,  
10 testes) from a single individual and supplement this with population level renal transcrip-  
11 tome sequencing from 15 additional animals. We identified a set of transcripts undergoing  
12 both purifying and balancing selection based on estimates of Tajima's D. In addition, we  
13 used the branch-site test to identify a transcript – *Slc2a9*, likely related to desert os-  
14 moregulation – undergoing enhanced selection in *P. eremicus* relative to a set of related  
15 non-desert rodents.

16

## 17 Introduction

18 Deserts are widely considered one of the harshest environments on Earth. Animals living  
19 in desert environments are forced to endure intense heat and drought, and as a result,  
20 species living in these environments are likely to possess specialized mechanisms to deal  
21 with them. While living in deserts likely involves a large number of adaptive traits, the  
22 ability to osmoregulate – to maintain the proper water and electrolyte balance – appears

23 to be paramount (Walsberg, 2000). Indeed, the maintenance of water balance is one of  
24 the most important physiologic processes for all organisms, whether they be desert inhab-  
25 itants or not. Most animals are exquisitely sensitive to changes in osmolality, with slight  
26 derangement eliciting physiologic compromise. When the loss of water exceeds dietary  
27 intake, dehydration - and in extreme cases, death - can occur. Thus there has likely been  
28 strong selection for mechanisms supporting optimal osmoregulation in species that live  
29 where water is limited. Understanding these mechanisms will significantly enhance our  
30 understanding of the physiologic processes underlying osmoregulation in extreme envi-  
31 ronments, which will have implications for studies of human health, conservation, and  
32 climate change.

33

34 The genes and structures responsible for the maintenance of water and electrolyte  
35 balance are well characterized in model organisms such as mice (Tatum et al., 2009), rats  
36 (Romero et al., 2007; Rojek et al., 2006; Nielsen et al., 1995), and humans (Mobasheri  
37 et al., 2007; Bedford et al., 2003; Nielsen et al., 1999). These studies, many of which  
38 have been enabled by newer sequencing technologies, provide a foundation for studies of  
39 renal genomics in non-model organisms. Because researchers have long been interested  
40 in desert adaptation, a number of studies have looked at the morphology or expression  
41 of single genes in the renal tissues of desert adapted rodents *Phyllotis darwini* (Gallardo  
42 et al., 2005), *Psammomys obesus* (Kaissling et al., 1975), and *Perognathus penicillatus*  
43 (Altschuler et al., 1979). More recently, full renal transcriptomes have been generated for  
44 *Dipodomys spectabilis* and *Chaetodipus baileyi*, (Marra et al., 2014) as well as *Abrothrix*  
45 *olivacea* (Giorello et al., 2014).

46

47 These studies provide a rich context for current and future work aimed at developing  
48 a synthetic understanding of the genetic and genomic underpinnings of desert adaptation  
49 in rodents. As a first step, we have sequenced, assembled, and characterized the tran-  
50 scriptome (using four tissue types - liver, kidney, testes and brain) of a desert adapted  
51 cricetid rodent endemic to the southwest United States, *Peromyscus eremicus*. These an-  
52 imals have a lifespan typical of small mammals (Veal and Caire, 2001), and therefore an  
53 individual may live its entire life without ever drinking water. Additionally, they have a  
54 distinct advantage over other desert animals (e.g. *Dipodomys*) in that they breed readily  
55 in captivity, which enables future laboratory studies of the phenotype of interest. In addi-  
56 tion, the focal species is positioned in a clade of well known animals (e.g. *P. californicus*,

57 *P. maniculatus*, and *P. polionotus*) (Feng et al., 2007) with growing genetic and genomic  
58 resources (Shorter et al., 2014; Panhuis et al., 2011; Shorter et al., 2012). Together, this  
59 suggests that future comparative studies are possible.

60

61 While the elucidation of the mechanisms underlying adaptation to desert survival is  
62 beyond the scope of this manuscript, we aim to lay the groundwork by characterizing the  
63 transcriptome from four distinct tissues (brain, liver, kidney, testes). These data will be  
64 included in the current larger effort aimed at sequencing the entire genome. Further, via  
65 sequencing the renal tissue of a total of 15 additional animals, we characterize nucleotide  
66 polymorphism and genome-wide patterns of natural selection. Together, these investiga-  
67 tions will aid in our overarching goal to understand the genetic basis of adaptation to  
68 deserts in *P. eremicus*.

## 69 **Materials and Methods**

### 70 **Animal Collection and Study Design**

71 To begin to understand how genes may underlie desert adaptation, we collected 16 adult  
72 individuals (9 male, 7 female) from a single population of *P. eremicus* over a two-year time  
73 period (2012-2013). These individuals were captured in live traps and then euthanized  
74 using isoflurane overdose and decapitation. Immediately post-mortem, the abdominal and  
75 pelvic organs were removed, cut in half (in the case of the kidneys), placed in RNAlater and  
76 flash frozen in liquid nitrogen. Removal of the brain, with similar preservation techniques,  
77 followed. Time from euthanasia to removal of all organs never exceeded five minutes.  
78 Samples were transferred to a -80C freezer at a later date. These procedures were approved  
79 by the Animal Care and Use Committee located at the University of California Berkeley  
80 (protocol number R224) and University of New Hampshire (protocol number 130902) as  
81 well as the California Department of Fish and Game (protocol SC-008135) and followed  
82 guidelines established by the American Society of Mammalogy for the use of wild animals  
83 in research (Sikes et al., 2011).

### 84 **RNA extraction and Sequencing**

85 Total RNA was extracted from each tissue using a TRIzol extraction (Invitrogen) fol-  
86 lowing the manufacturer's instructions. Because preparation of an RNA library suitable

87 for sequencing is dependent on having high quality, intact RNA, a small aliquot of each  
88 total RNA extract was analyzed on a Bioanalyzer 2100 (Agilent, Palo Alto, CA, USA).  
89 Following confirmation of sample quality, the reference sequencing libraries were made  
90 using the TruSeq stranded RNA prep kit (Illumina), while an unstranded TruSeq kit was  
91 used to construct the other sequencing libraries. A unique index was ligated to each  
92 sample to allow for multiplexed sequencing. Reference libraries (n=4 tissue types from  
93 Peer360, a male mouse used for generating a genome sequence - not part of the current  
94 study) were then pooled to contain equimolar quantities of each individual library and  
95 submitted for Illumina sequencing using two lanes of 150nt paired end sequencing em-  
96 ploying the rapid-mode of the HiSeq 2500 sequencer at The Hubbard Center for Genome  
97 Sciences (University of New Hampshire). The remaining 15 libraries were multiplexed  
98 and sequenced in a mixture of 100nt paired and single end sequencing runs across several  
99 lanes of an Illumina HiSeq 2000 at the Vincent G. Coates Genome Center (University of  
100 California, Berkeley).

## 101 **Sequence Data Preprocessing and Assembly**

102 The raw sequence reads corresponding to the four tissue types were error corrected using  
103 the software `bless` version 0.17 (Heo et al., 2014) using `kmer=25`, based on the developer's  
104 default recommendations ([https://github.com/macmanes/pero\\_transcriptome/blob/](https://github.com/macmanes/pero_transcriptome/blob/master/analyses.md#error-correction)  
105 `master/analyses.md#error-correction`). The error-corrected sequence reads were adapter  
106 and quality trimmed following recommendations from MacManes (MacManes, 2014) and  
107 Mbandi (Mbandi et al., 2014). Specifically, adapter sequence contamination and low  
108 quality nucleotides (defined as PHRED <2) were removed using the program `Trimmo-`  
109 `matic` version 0.32 (Bolger et al., 2014). Reads from each tissue were assembled using the  
110 `Trinity` version released 17 July 2014 (Haas et al., 2013). We used flags to indicate the  
111 stranded nature of sequencing reads and set the maximum allowable physical distance be-  
112 tween read pairs to 999nt ([https://github.com/macmanes/pero\\_transcriptome/blob/](https://github.com/macmanes/pero_transcriptome/blob/master/analyses.md#trinity-assemblies)  
113 `master/analyses.md#trinity-assemblies`). We elected to assembly reads derived from  
114 a single deeply sequenced individual (Peer360, a male) to reduce polymorphism and thus  
115 the complexity of the de Bruijn graph, which has important implications for runtime,  
116 hardware requirements (Lowe et al., 2014; Pop, 2009), and assembly contiguity (Vijay  
117 et al., 2013). Individual tissues were assembled independently, as we hypothesize that  
118 tissue specific isoforms would be reconstructed with higher fidelity that if all tissues were  
119 assembled together.

120 The assembly was conducted on a linux workstation with 64 cores and 512Gb RAM.  
121 To filter the raw sequence assembly, we downloaded *Mus musculus* cDNA and ncRNA  
122 datasets from Ensembl ([ftp://ftp.ensembl.org/pub/release-75/fasta/mus\\_musculus/](ftp://ftp.ensembl.org/pub/release-75/fasta/mus_musculus/))  
123 and the *Peromyscus maniculatus* reference transcriptome from NCBI ([ftp://ftp.ncbi.nlm.nih.gov/genomes/Peromyscus\\_maniculatus\\_bairdii/RNA/](ftp://ftp.ncbi.nlm.nih.gov/genomes/Peromyscus_maniculatus_bairdii/RNA/)). We used a blastN  
124 (version 2.2.29+) procedure (default settings, evaluate set to  $10^{-10}$ ) to identify contigs in  
125 the *P. eremicus* dataset likely to be biological in origin ([https://github.com/macmanes/pero\\_transcriptome/blob/master/analyses.md#blasting](https://github.com/macmanes/pero_transcriptome/blob/master/analyses.md#blasting)). This procedure, when a  
126 reference dataset is available, retains more putative transcripts than a strategy employing  
127 expression-based filtering (remove if transcripts per million (TPM)  $<1$  (MacManes and  
128 Lacey, 2012)) of the raw assembly. We then concatenated the filtered assemblies from each  
129 tissue into a single file and reduced redundancy using the software cd-hit-est version 4.6 (Li  
130 and Godzik, 2006) using default settings, except that sequences were clustered based on  
131 95% sequence similarity ([https://github.com/macmanes/pero\\_transcriptome/blob/master/analyses.md#cd-hit-est](https://github.com/macmanes/pero_transcriptome/blob/master/analyses.md#cd-hit-est)). This multi-fasta file was used for all subsequent  
132 analyses, including annotation and mapping.  
133  
134  
135  
136

## 137 Assembled Sequence Annotation

138 The filtered assemblies were annotated using the default settings of the blastN algorithm  
139 (Camacho et al., 2009) against the Ensembl cDNA and ncRNA datasets described above,  
140 downloaded on 1 August 2014. Among other things, the Ensemble transcript identifiers  
141 were used in the analysis of gene ontology conducted in the PANTHER package (Mi,  
142 2004). Next, because rapidly evolving nucleotide sequences may evade detection by blast  
143 algorithms, we used HMMER3 version 3.1b1 (Wheeler and Eddy, 2013) to search for con-  
144 served protein domains contained in the dataset using the Pfam database (Punta et al.,  
145 2012) ([https://github.com/macmanes/pero\\_transcriptome/blob/master/analyses.md#hmmer3pfam](https://github.com/macmanes/pero_transcriptome/blob/master/analyses.md#hmmer3pfam)). Lastly, we extracted putative coding sequences using Transdecoder ver-  
146 sion 4Jul2014 (<http://transdecoder.sourceforge.net/>) ([https://github.com/macmanes/pero\\_transcriptome/blob/master/analyses.md#transdecoder](https://github.com/macmanes/pero_transcriptome/blob/master/analyses.md#transdecoder))  
147  
148  
149

150 To identify patterns of gene expression unique to each tissue type, we mapped sequence  
151 reads from each tissue type to the reference assembly using bwa-mem (version cloned from  
152 Github 7/1/2014) (Li, 2013). We estimated expression for the four tissues individually

153 using default settings of the software eXpress version 1.51 (Roberts and Pachter, 2013).  
154 Interesting patterns of expression, including instances where expression was limited to a  
155 single tissue type, were identified and visualized.

156

## 157 **Population Genomics**

158 In addition to the reference individual sequenced at four different tissue types, we se-  
159 quenced 15 other conspecific individuals from the same population in Palm Desert, Cali-  
160 fornia. Sequence data were mapped to the reference transcriptome using bwa-mem. The  
161 alignments were sorted and converted to BAM format using the samtools software pack-  
162 age (Li et al., 2009), then passed to the program ANGSD version 0.610, which was used  
163 for calculating the folded site frequency spectrum (SFS) and Tajima's D (Korneliusson  
164 et al., 2013) using instructions found at <http://popgen.dk/angsd/index.php/Tajima>.

165

## 166 **Natural Selection**

167 To characterize natural selection on several genes related to water and ion homeostasis, we  
168 identified several of the transcripts identified as experiencing positive selection in a recent  
169 work on desert-adapted Heteromyid rodents (Marra et al., 2014). The coding sequences  
170 corresponding to these genes, Solute Carrier family 2 member 9 (Slc2a9), the Vitamin  
171 D3 receptor (Vdr) and several of the Aquaporin genes (Aqp1,2,4,9), were extracted from  
172 the dataset, aligned using the software MACSE version 1.01b (Ranwez et al., 2011) to  
173 homologous sequences in *Mus musculus*, *Rattus norvegicus*, *Peromyscus maniculatus*, and  
174 *Homo sapiens* as identified by the conditional reciprocal best blast procedure (CRBB,  
175 (Aubry et al., 2014)). An unrooted gene tree with branch lengths was constructed using  
176 the online resource ClustalW2-Phylogeny ([http://www.ebi.ac.uk/Tools/phylogeny/clustalw2\\_phylogeny/](http://www.ebi.ac.uk/Tools/phylogeny/clustalw2_phylogeny/)), and the tree and alignment were analyzed using the branch-  
178 site model (model=2, nsSites=2, fix\_omega=0 versus model=2, nsSites=2, fix\_omega=1,  
179 omega=1) implemented in PAML version 4.8 (Yang and dos Reis, 2011; Yang, 2007).  
180 Significance was evaluated via the use of the likelihood ratio test.

181

## 182 **Results and Discussion**

### 183 **RNA extraction, Sequencing, Assembly, Mapping**

184 RNA was extracted from the hypothalamus, renal medulla, testes, and liver from each  
185 individual using sterile technique. TRIzol extraction resulted in a large amount of high  
186 quality ( $RIN \geq 8$ ) total RNA, which was then used as input. Libraries were constructed  
187 as per the standard Illumina protocol and sequenced as described above. The number  
188 of reads per library varied from 56 million strand-specific paired-end reads in Peer360  
189 kidney, to 9 million single-end reads in Peer321 (Table 1, available as part BioProject  
190 PRJNA242486). Adapter sequence contamination and low-quality nucleotides were elim-  
191 inated, which resulted in a loss of  $<2\%$  of the total number of reads. These trimmed  
192 reads served as input for all downstream analyses.

#### 193 **Table 1**

194



| DATASET        | NUM. RAW READS | SRA ACCESSION |
|----------------|----------------|---------------|
| PEER360 TESTES | 32M PE/SS      | SRR1575398    |
| PEER360 LIVER  | 53M PE/SS      | SRR1575397    |
| PEER360 KIDNEY | 56M PE/SS      | SRR1575396    |
| PEER360 BRAIN  | 23M PE/SS      | SRR1575395    |
| PEER305        | 19M PE         | SRR1575434    |
| PEER308        | 15M PE         | SRR1575437    |
| PEER319        | 14M PE         | SRR1575439    |
| PEER321        | 9M SE          | SRR1575441    |
| PEER340        | 16M PE         | SRR1575443    |
| 195 PEER352    | 14M PE         | SRR1575464    |
| PEER354        | 9M SE          | SRR1575466    |
| PEER359        | 14M PE         | SRR1575492    |
| PEER365        | 16M PE         | SRR1575493    |
| PEER366        | 16M PE         | SRR1575494    |
| PEER368        | 14M PE         | SRR1575624    |
| PEER369        | 14M PE         | SRR1575625    |
| PEER372        | 17M SE         | SRR1576070    |
| PEER373        | 23M SE         | SRR1576071    |
| PEER380        | 16M SE         | SRR1576072    |
| PEER382        | 14M SE         | SRR1576073    |

196 Table 1. The number of sequencing reads per sample, whose identity is indicated  
197 by Peer[number]. PE=paired end, SS=strand specific, SE=single end sequencing.

198 Transcriptome assemblies for each tissue type was accomplished using the program  
199 Trinity (Haas et al., 2013). The raw assemblies for brain, liver, testes, and kidney con-  
200 tained 185425, 222096, 180233, and 514091 assembled sequences respectively. This as-  
201 sembly was filtered using a blastN procedure against the *Mus* cDNA and ncRNA and  
202 *P. maniculatus* cDNAs, which resulted in a final dataset containing 68331 brain-derived  
203 transcripts, 71041 liver-derived transcripts, 67340 testes-derived transcripts, and 113050  
204 kidney-derived transcripts. Mapping the error-corrected adapter/quality trimmed reads  
205 to these datasets resulted in mapping 94.98% (87.01% properly paired) of the brain-  
206 derived reads to the brain transcriptome, 96.07% (88.13% properly paired) of the liver-  
207 derived reads to the liver transcriptome, 96.81% (85.10% properly paired) of the testes-  
208 derived reads to the testes transcriptome, and 91.87% (83.77% properly paired) of the



209 kidney-derived reads to the kidney transcriptome. Together, these statistics suggest that  
210 the tissue-specific transcriptomes are of extremely high quality. All tissue-specific assem-  
211 blies are to be made available on Dryad, and until then are stored on Dropbox ([https://www.dropbox.com/sh/2jwzd8p6n6eluco/AAA03nSdXb\\_u4wtQZRTwqW9ia?dl=0](https://www.dropbox.com/sh/2jwzd8p6n6eluco/AAA03nSdXb_u4wtQZRTwqW9ia?dl=0)).  
212

213

214 **Figure 1**

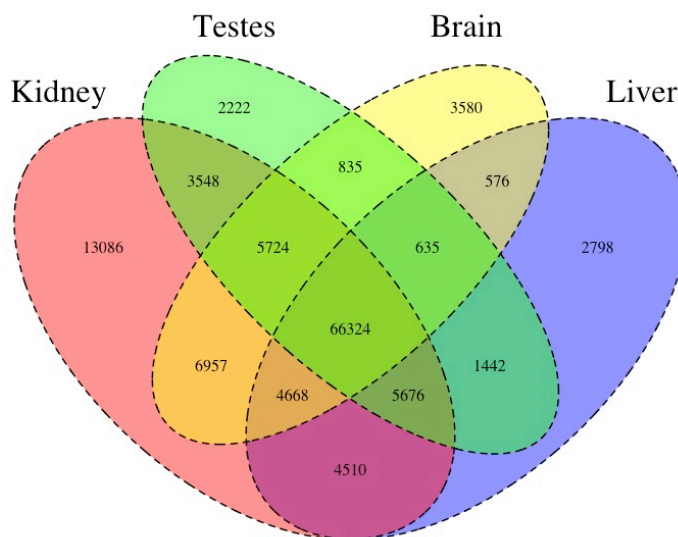

215

216 Figure 1. The Venn Diagram, which provides a visual representation of the overlap  
217 of expression of the four tissue types. The majority of transcripts (66,324) are  
218 expressed in all studied tissue types.

219 We then estimated gene expression on each of these tissue-specific datasets, which al-  
220 lowed us to understand expression patterns in the multiple tissues (Pero.tissue.xprs, will  
221 be made available on Dryad, until then on Dropbox ([https://www.dropbox.com/sh/2jwzd8p6n6eluco/AAA03nSdXb\\_u4wtQZRTwqW9ia?dl=0](https://www.dropbox.com/sh/2jwzd8p6n6eluco/AAA03nSdXb_u4wtQZRTwqW9ia?dl=0))). Specifically, we constructed a  
222 Venn diagram (Figure 1) that allowed us to visualize the proportion of genes whose ex-  
223 pression was limited to a single tissue and those whose expression was ubiquitous. 66324  
224 transcripts are expressed on all tissue types, while 13086 are uniquely expressed in the  
225 kidney, 2222 in the testes, 3580 in the brain, and 2798 in the liver. The kidney appears  
226 to an outlier in the number of unique sequences, though this could be the result of the  
227 recovery of more lowly expressed transcripts or isoforms.  
228

229

230 In addition to this, we estimated mean TPM (number of transcripts per million) for  
231 all transcripts. Table 2 consists of the 10 genes whose mean TPM was the highest. Sev-  
232 eral genes in this list are predominately present in a single tissue type. For instance  
233 Transcript\_126459, Albumin is very highly expressed in the liver, but less so in the other  
234 tissues. It should be noted, however, that making inference based on uncorrected values  
235 for TPM is not warranted. Statistical testing for differential expression was not imple-  
236 mented due to the fact that no replicates are available.

237

238 After expression estimation, the filtered assemblies were concatenated together, and  
239 after the removal of redundancy with cd-hit-est, 122,584 putative transcripts remained  
240 (to be made available on Genbank, and until then are stored on Dropbox [https://www.  
241 dropbox.com/sh/2jwzd8p6n6eluco/AAA03nSdXb\\_u4wtQZRTwqW9ia?dl=0](https://www.dropbox.com/sh/2jwzd8p6n6eluco/AAA03nSdXb_u4wtQZRTwqW9ia?dl=0)). From this fil-  
242 tered concatenated dataset, we extracted 71626 putative coding sequences (72Mb, to be  
243 made available on Dryad). Of these 71626 sequences, 38221 contained complete open read-  
244 ing frames (containing both start and stop codons), while the others were either truncated  
245 at the 5-prime end (20239 sequences), the 3-prime end (6445 sequences), or were inter-  
246 nal (6721 sequencing with neither stop nor start codon). The results of a Pfam search  
247 conducted on the predicted amino acid sequences will be found on Dryad, and until then  
248 are stored on Dropbox [https://www.dropbox.com/sh/2jwzd8p6n6eluco/AAA03nSdXb\\_  
249 u4wtQZRTwqW9ia?dl=0](https://www.dropbox.com/sh/2jwzd8p6n6eluco/AAA03nSdXb_u4wtQZRTwqW9ia?dl=0)..

250

251 **Table 2**

252

|     | <b>Transcript ID</b> | <b>Testes</b> | <b>Liver</b> | <b>Kidney</b> | <b>Brain</b> | <b>Genbank ID</b> | <b>Gene ID</b> |
|-----|----------------------|---------------|--------------|---------------|--------------|-------------------|----------------|
|     | Transcript_83842     | 2.05E+03      | 6.40E+03     | 1.03E+04      | 5.47E+03     | DQ073446.1        | COX2           |
|     | Transcript_126459    | 1.43E+01      | 2.22E+04     | 2.77E+01      | 6.73E+00     | XM_006991665.1    | Alb            |
|     | Transcript_128937    | 4.39E+00      | 1.91E+04     | 4.74E+02      | 2.23E+00     | XM_007627625.1    | Apoa2          |
|     | Transcript_81233     | 1.71E+03      | 5.23E+03     | 6.11E+03      | 3.08E+03     | XM_006993867.1    | Fth1           |
| 253 | Transcript_94125     | 3.67E+01      | 1.08E+04     | 2.09E+03      | 2.75E+00     | XM_006977178.1    | CytP450        |
|     | Transcript_119945    | 5.03E+03      | 1.15E+03     | 1.33E+03      | 3.71E+03     | XM_008686011.1    | Ubb            |
|     | Transcript_5977      | 4.95E+00      | 1.01E+04     | 3.05E+02      | 3.58E+02     | XM_006978668.1    | Tf             |
|     | Transcript_4057      | 2.62E+01      | 9.32E+03     | 1.34E+02      | 8.38E+01     | XM_006994871.1    | Apoc1          |
|     | Transcript_112523    | 4.07E+02      | 7.36E+03     | 7.78E+02      | 9.54E+02     | XM_006994872.1    | Apoe           |
|     | Transcript_98376     | 1.98E+00      | 8.66E+03     | 1.02E+00      | 2.68E+00     | XM_006970208.1    | Ttr            |

254 Table 2. The 10 transcripts with the highest mean TPM (transcripts per million).

## 255 Population Genomics

256 As detailed above, RNAseq data from 15 individuals were mapped to the reference tran-  
257 scriptome with the resulting BAM files being used as input to the software package  
258 ANGSD. The Tajima's D statistic was calculated for all transcripts covered by at least  
259 14 of the 15 individuals. In brief, a negative Tajima's D - a result of lower than expected  
260 average heterozygosity - is often associated with purifying or directional selection, recent  
261 selective sweep or recent population expansion, or a complex combination of these forces.  
262 In contrast, a positive value for Tajima's D represents higher than expected average het-  
263 erozygosity, often associated with balancing selection.

264  
265 The distribution of the estimates of Tajima's D for all of the assembled transcripts is  
266 shown in Figure 2. Although Tajima's D is known to be sensitive to demographic history,  
267 which is largely unknown for this population, the estimates may also be drive by patterns  
268 of selection. In general, the distribution is skewed toward negative values (mean=-0.89,  
269 variance=0.58), which may be the result of purifying selection, a model of evolution com-  
270 monly invoked for coding DNA sequences (Chamary et al., 2006). Table 3 presents the  
271 10 transcripts whose estimate of Tajima's D is the greatest, while Table 4 presents the  
272 10 transcripts whose estimate of Tajima's D is the least. The former list of genes may  
273 contain transcripts experiencing balancing selection in the studied population. This list  
274 includes, interestingly, genes obviously related to solute and water balance (e.g. Clcnkb

275 and a transmembrane protein gene) and immune function (a interferon-inducible GTPase  
276 and a Class 1 MHC gene). The latter group, containing transcripts whose estimates of  
277 Tajima's D are the smallest are likely experiencing purifying selection. Many of these  
278 transcripts are involved in core regulatory functions where mutation may have strongly  
279 negative fitness consequences.

280

281 **Figure 2**

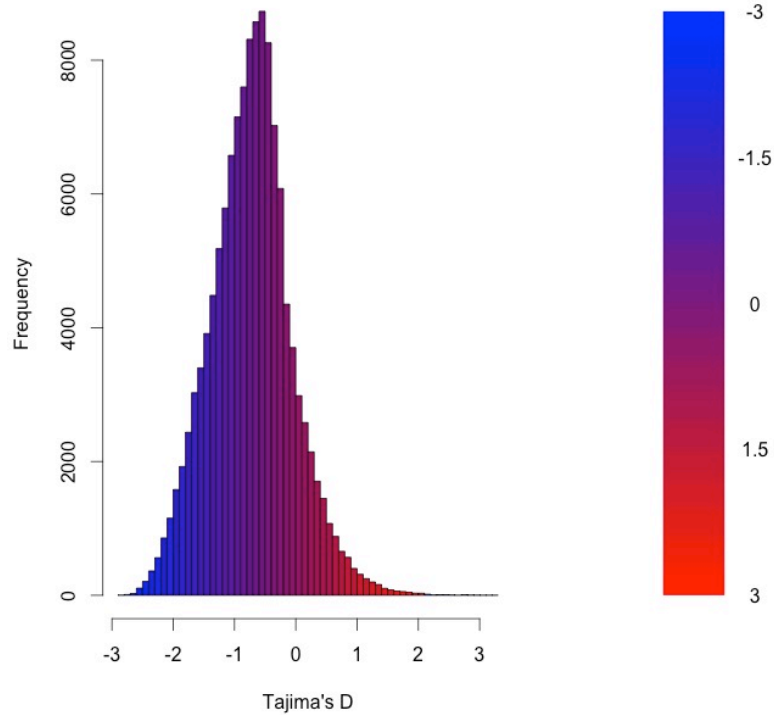

282

283 Figure 2. The distribution of Tajima's D for all putative transcripts.

284 **Table 3**

285

| Transcript ID     | GenBank ID     | Description                                         | Tajima's D |
|-------------------|----------------|-----------------------------------------------------|------------|
| Transcript_49049  | XM_006533884.1 | heterogeneous nuclear ribonucleoprotein H1 (Hnrnp1) | 3.26       |
| Transcript_38378  | XM_006522973.1 | Son DNA binding protein (Son)                       | 3.19       |
| Transcript_126187 | NM_133739.2    | transmembrane protein 123 (Tmem123)                 | 3.02       |
| Transcript_70953  | XM_006539066.1 | chloride channel Kb (Clcnkb)                        | 2.96       |
| Transcript_37736  | XM_006997718.1 | h-2 class I histocompatibility antigen              | 2.92       |
| Transcript_21448  | XM_006986148.1 | zinc finger protein 624-like                        | 2.84       |
| Transcript_47450  | NM_009560.2    | zinc finger protein 60 (Zfp60)                      | 2.82       |
| Transcript_122250 | XM_006539068.1 | chloride channel Kb (Clcnkb)                        | 2.81       |
| Transcript_78367  | XM_006496814.1 | CDC42 binding protein kinase alpha (Cdc42bpa)       | 2.78       |
| Transcript_96470  | XM_006987129.1 | interferon-inducible GTPase 1-like                  | 2.77       |

Table 3. The 10 transcripts with the highest values for Tajima's D, which suggests balancing selection.

288 **Table 4**

289

| Transcript ID     | GenBank ID     | Description                                               | Tajima's D |
|-------------------|----------------|-----------------------------------------------------------|------------|
| Transcript_84359  | XM_006991127.1 | nuclear receptor coactivator 3 (Ncoa3)                    | -2.82      |
| Transcript_87121  | XM_006970128.1 | methyl-CpG binding domain protein 2 (Mbd2)                | -2.82      |
| Transcript_125755 | EU053203.1     | alpha globin gene cluster                                 | -2.78      |
| Transcript_87128  | XM_006976644.1 | membrane-associated ring finger (March5)                  | -2.76      |
| Transcript_55468  | XM_006978377.1 | Vpr binding protein (Vprbp)                               | -2.75      |
| Transcript_116042 | XM_006980811.1 | membrane associated guanylate kinase (Magi3)              | -2.75      |
| Transcript_18966  | XM_006982814.1 | ubiquitin protein ligase E3 component n-recognin 5 (Ubr5) | -2.75      |
| Transcript_122204 | XM_008772511.1 | zinc finger protein 612 (Zfp612)                          | -2.75      |
| Transcript_100550 | XM_006971297.1 | bromodomain adjacent to zinc finger domain, 1B (Baz1b)    | -2.74      |
| Transcript_33267  | XM_006975561.1 | pumilio RNA-binding family member 1 (Pum1)                | -2.75      |

Table 4. The 10 transcripts with the lowest values for Tajima's D, which suggests purifying or directional selection.

## 293 **Natural Selection**

294 To begin to test the hypothesis that selection on transcripts related to osmoregulation is  
295 enhanced in the desert adapted *P. eremicus*, we calculated Tajima's D as described above,

296 and implemented the branch-site test using alignments produced in MACSE. These align-  
297 ments were manually inspected, and were relatively free from indels and internal stop  
298 codons. We set the sequence corresponding to *P. eremicus* for Slc2a9, Vdr, and several  
299 of the Aquaporin genes (Aqp1,2,4,9) as the foreground lineages in six distinct program  
300 executions. These transcripts Slc2a9 and Vdr were chosen specifically because they - the  
301 former significantly - were recently linked to osmoregulation in a desert rodent (Marra  
302 et al., 2014). The test for Slc2a9 was highly significant ( $2\Delta Lnl=51.4$ ,  $df=1$ ,  $p=0$ , Ta-  
303 ble 5), indicating enhanced selection in *P. eremicus* relative to the other lineages. The  
304 branch site test for positive selection conducted on the Vdr and Aquaporin genes were  
305 non-significant. While the branch site test of positive selection is largely non-significant,  
306 estimating Tajima's D for these few candidate loci demonstrates that either a selective  
307 or demographic process may be influencing the genome at these functionally relevant sites.

308

309 **Table 5**

310

| Transcript ID         | Description | Tajima's D | Branch Site Test p.value |
|-----------------------|-------------|------------|--------------------------|
| Transcript_106085     | Slc2a9      | 2.15       | p=0                      |
| Transcript_114624     | Vdr         | 1.97       | p=1                      |
| 311 Transcript_128972 | Aqp1        | 1.39       | p=1                      |
| Transcript_33960      | Aqp2        | 1.78       | p=1                      |
| Transcript_22154      | Aqp4        | 2.10       | p=1                      |
| Transcript_107677     | Aqp9        | 2.06       | p=1                      |

312 Table 5. Several candidate genes were evaluated using Tajima's D and the branch  
313 site test implemented in PAML.

## 314 Conclusions

315 As a direct result of intense heat and aridity, deserts are thought to be amongst the harsh-  
316 est environments, particularly for mammalian inhabitants. Given that osmoregulation can  
317 be challenging for these animals - with failure resulting in death - strong selection should  
318 be observed on genes related to the maintenance of water and solute balance. This study  
319 aimed to characterize the transcriptome of a desert-adapted rodent species, *P. eremicus*.  
320 Specifically, we characterized the transcriptome of four tissue types (liver, kidney, brain,  
321 and testes) from a single individual and supplemented this with population-level renal

322 transcriptome sequencing from 15 additional animals. We identified a set of transcripts  
323 undergoing both purifying and balancing selection based on Tajima's D. In addition,  
324 we used a branch site test to identify a transcript, likely related to desert osmoregula-  
325 tion, undergoing enhanced selection in *P. eremicus* relative to a set of non-desert rodents.  
326

## 327 Acknowledgments

328 This manuscript was greatly improved by careful review from C. Titus Brown, Elijah  
329 Lowe, and an anonymous reviewer, as well as by Matthew Hahn, who provided feedback  
330 on an earlier version of the manuscript posted on bioRxiv.

## 331 References

- 332 Altschuler, E. M., Nagle, R. B., Braun, E. J., Lindstedt, S. L., and Krutzsch, P. H.  
333 (1979). Morphological study of the desert heteromyid kidney with emphasis on the  
334 genus *Perognathus*. *The Anatomical Record*, 194(3):461–468.
- 335 Aubry, S., Kelly, S., Kumpers, B. M. C., Smith-Unna, R. D., and Hibberd, J. M. (2014).  
336 Deep Evolutionary Comparison of Gene Expression Identifies Parallel Recruitment of  
337 Trans-Factors in Two Independent Origins of C4 Photosynthesis. *PLOS Genetics*,  
338 10(6):e1004365.
- 339 Bedford, J. J., Leader, J. P., and Walker, R. J. (2003). Aquaporin expression in normal  
340 human kidney and in renal disease. *Journal of the American Society of Nephrology*,  
341 14(10):2581–2587.
- 342 Bolger, A. M., Lohse, M., and Usadel, B. (2014). Trimmomatic: a flexible trimmer for  
343 Illumina sequence data. *Bioinformatics*, 30(15):btu170–2120.
- 344 Camacho, C., Coulouris, G., Avagyan, V., Ma, N., Papadopoulos, J., Bealer, K., and  
345 Madden, T. L. (2009). BLAST+: architecture and applications. *BMC Bioinformatics*,  
346 10(1):421.
- 347 Chamary, J. V., Parmley, J. L., and Hurst, L. D. (2006). Hearing silence: Non-neutral  
348 evolution at synonymous sites in mammals. *Nature Reviews Genetics*, 7(2):98–108.



- 349 Feng, B.-J., Sun, L.-D., Soltani-Arabshahi, R., Bowcock, A. M., Nair, R. P., Stuart,  
350 P., Elder, J. T., Schrodi, S. J., Begovich, A. B., Abecasis, G. R., Zhang, X.-J., Callis-  
351 Duffin, K. P., Krueger, G. G., and Goldgar, D. E. (2007). Toward a Molecular Phylogeny  
352 for *Peromyscus*: Evidence from Mitochondrial Cytochrome- b Sequences. *Journal of*  
353 *Mammalogy*, 88(5):1146–1159.
- 354 Gallardo, P. A., Cortés, A., and Bozinovic, F. (2005). Phenotypic flexibility at the molec-  
355 ular and organismal level allows desert-dwelling rodents to cope with seasonal water  
356 availability. *Physiological and Biochemical Zoology*, 78(2):145–152.
- 357 Giorello, F. M., Feijoo, M., D’Elía, G., Valdez, L., Opazo, J. C., Varas, V., Naya, D. E.,  
358 and Lessa, E. P. (2014). Characterization of the kidney transcriptome of the South  
359 American olive mouse *Abrothrix olivacea*. *BMC Genomics*, 15(1):446.
- 360 Haas, B. J., Papanicolaou, A., Yassour, M., Grabherr, M., Blood, P. D., Bowden, J.,  
361 Couger, M. B., Eccles, D., Li, B., Lieber, M., MacManes, M. D., Ott, M., Orvis, J.,  
362 Pochet, N., Strozzi, F., Weeks, N., Westerman, R., William, T., Dewey, C. N., Henschel,  
363 R., Leduc, R. D., Friedman, N., and Regev, A. (2013). *De novo* transcript sequence  
364 reconstruction from RNA-seq using the Trinity platform for reference generation and  
365 analysis. *Nature Protocols*, 8(8):1494–1512.
- 366 Heo, Y., Wu, X.-L., Chen, D., Ma, J., and Hwu, W.-M. (2014). BLESS: Bloom filter-  
367 based error correction solution for high-throughput sequencing reads. *Bioinformatics*,  
368 30(10):1354–1362.
- 369 Kaissling, B., De Rouffignac, C., Barrett, J. M., and Kriz, W. (1975). The structural  
370 organization of the kidney of the desert rodent *Psammomys obesus*. *Anatomy and*  
371 *Embryology*, 148(2):121–143.
- 372 Korneliussen, Thorfinn Sand Moltke, I., Albrechtsen, a., and Nielsen, R. (2013). Calcula-  
373 tion of Tajima’s D and other neutrality test statistics from low depth next-generation  
374 sequencing data. *BMC Bioinformatics*, 14(1):289.
- 375 Li, H. (2013). Aligning sequence reads, clone sequences and assembly contigs with BWA-  
376 MEM. *arXiv*.
- 377 Li, H., Handsaker, B., Wysoker, A., Fennell, T., Ruan, J., Homer, N., Marth, G., Abecasis,

- 378 G., Durbin, R., and 1000 Genome Project Data Processing Subgroup (2009). The  
379 Sequence Alignment/Map format and SAMtools. *Bioinformatics*, 25(16):2078–2079.
- 380 Li, W. and Godzik, A. (2006). Cd-hit: A fast program for clustering and comparing large  
381 sets of protein or nucleotide sequences. *Bioinformatics*, 22(13):1658–1659.
- 382 Lowe, E. K., Swalla, B. J., and Brown, C. T. (2014). Evaluating a lightweight transcrip-  
383 tome assembly pipeline on two closely related Ascidian species. *PeerJ Preprints*, pages  
384 1–11.
- 385 MacManes, M. D. (2014). On the optimal trimming of high-throughput mRNA sequence  
386 data. *Frontiers in Genetics*, 5:1–13.
- 387 MacManes, M. D. and Lacey, E. A. (2012). The Social Brain: Transcriptome Assembly  
388 and Characterization of the Hippocampus from a Social Subterranean Rodent, the  
389 Colonial Tuco-Tuco (*Ctenomys sociabilis*). *PLOS ONE*, 7(9):e45524.
- 390 Marra, N. J., Romero, A., and DeWoody, J. A. (2014). Natural selection and the genetic  
391 basis of osmoregulation in heteromyid rodents as revealed by RNA-seq. *Molecular*  
392 *Ecology*, 23(11):2699–2711.
- 393 Mbandi, S. K., Hesse, U., Rees, D. J. G., and Christoffels, A. (2014). A glance at quality  
394 score: Implication for *de novo* transcriptome reconstruction of Illumina reads. *Frontiers*  
395 *in Genetics*, 5:1–17.
- 396 Mi, H. (2004). The PANTHER database of protein families, subfamilies, functions and  
397 pathways. *Nucleic Acids Research*, 33(1):D284–D288.
- 398 Mobasher, A., Marples, D., Young, I. S., Floyd, R. V., Moskaluk, C. A., and Frigeri,  
399 A. (2007). Distribution of the AQP4 Water Channel in Normal Human Tissues: Pro-  
400 tein and Tissue Microarrays Reveal Expression in Several New Anatomical Locations,  
401 including the Prostate Gland Seminal Vesicles. *Channels*, 1(1):30–39.
- 402 Nielsen, S., Chou, C., Marples, D., Christensen, E., Kishore, B., and Knepper, M. (1995).  
403 Vasopressin increases water permeability of kidney collecting duct by inducing translo-  
404 cation of Aquaporin-CD water channels to plasma-membrane. *Proceedings of The Na-  
405 tional Academy of Sciences of The United States of America*, 92(4):1013–1017.

- 406 Nielsen, S., Kwon, T. H., Christensen, B. M., Promeneur, D., Frøkiaer, J., and Marples, D.  
407 (1999). Physiology and pathophysiology of renal aquaporins. *Journal of the American*  
408 *Society of Nephrology*, 10(3):647–663.
- 409 Panhuis, T. M., Broitman-Maduro, G., Uhrig, J., Maduro, M., and Reznick, D. N. (2011).  
410 Analysis of Expressed Sequence Tags from the Placenta of the Live-Bearing Fish *Poe-*  
411 *ciliopsis* (Poeciliidae). *Journal of Heredity*, 102(3):352–361.
- 412 Pop, M. (2009). Genome assembly reborn: Recent computational challenges. *Briefings*  
413 *In Bioinformatics*, 10(4):354–366.
- 414 Punta, M., Cogill, P. C., Eberhardt, R. Y., Mistry, J., Tate, J., Boursnell, C., Pang,  
415 N., Forslund, K., Ceric, G., Clements, J., Heger, A., Holm, L., Sonnhammer, E. L. L.,  
416 Eddy, S. R., Bateman, A., and Finn, R. D. (2012). The Pfam protein families database.  
417 *Nucleic Acids Research*, 40:D290–301.
- 418 Ranwez, V., Harispe, S., Delsuc, F., and Douzery, E. J. P. (2011). MACSE: Multiple  
419 Alignment of Coding SEquences Accounting for Frameshifts and Stop Codons. *PLOS*  
420 *ONE*, 6(9):e22594.
- 421 Roberts, A. and Pachter, L. (2013). Streaming fragment assignment for real-time analysis  
422 of sequencing experiments. *Nature Methods*, 10(1):71–73.
- 423 Rojek, A., Fuchtbauer, E., Kwon, T., Frokiaer, J., and Nielsen, S. (2006). Severe urinary  
424 concentrating defect in renal collecting duct-selective AQP2 conditional-knockout mice.  
425 *Proceedings of The National Academy of Sciences of The United States of America*,  
426 103(15):6037–6042.
- 427 Romero, D. G., Plonczynski, M. W., Welsh, B. L., Gomez-Sanchez, C. E., Zhou, M. Y.,  
428 and Gomez-Sanchez, E. P. (2007). Gene expression profile in rat adrenal zona glomeru-  
429 losa cells stimulated with aldosterone secretagogues. *Physiological Genomics*, 32(1):117–  
430 127.
- 431 Shorter, K. R., Crossland, J. P., Webb, D., Szalai, G., Felder, M. R., and Vrana, P. B.  
432 (2012). *Peromyscus* as a Mammalian Epigenetic Model. *Genetics Research Interna-*  
433 *tional*, 2012:1–11.
- 434 Shorter, K. R., Owen, A., Anderson, V., Hall-South, A. C., Hayford, S., Cakora, P.,  
435 Crossland, J. P., Georgi, V. R. M., Perkins, A., Kelly, S. J., Felder, M. R., and Vrana,

- 436 P. B. (2014). Natural genetic variation underlying differences in *Peromyscus* repetitive  
437 and social/aggressive behaviors. *Behavior genetics*, 44(2):126–135.
- 438 Sikes, R. S., Gannon, W. L., and Animal Care and Use Committee of the American  
439 Society of Mammalogists (2011). Guidelines of the American Society of Mammalogists  
440 for the use of wild mammals in research. *Journal of Mammalogy*, 92(1):235–253.
- 441 Tatum, R., Zhang, Y., Salleng, K., Lu, Z., Lin, J. J., Lu, Q., Jeansonne, B. G., Ding,  
442 L., and Chen, Y. H. (2009). Renal salt wasting and chronic dehydration in claudin-7-  
443 deficient mice. *AJP: Renal Physiology*, 298(1):F24–F34.
- 444 Veal, R. and Caire, W. (2001). *Peromyscus eremicus*. *Mammalian Species*, 118:1–6.
- 445 Vijay, N., Poelstra, J. W., Künstner, A., Wolf, J. B. W., and Wolf, J. B. W. (2013).  
446 Challenges and strategies in transcriptome assembly and differential gene expression  
447 quantification. A comprehensive *in silico* assessment of RNA-seq experiments. *Molec-  
448 ular Ecology*, 22(3):620–634.
- 449 Walsberg, G. (2000). Small mammals in hot deserts: Some generalizations revisited.  
450 *Bioscience*, 50(2):109–120.
- 451 Wheeler, T. J. and Eddy, S. R. (2013). nhmmer: DNA homology search with profile  
452 HMMs. *Bioinformatics*, 29(19):2487–2489.
- 453 Yang, Z. (2007). PAML 4: Phylogenetic Analysis by Maximum Likelihood. *Molecular  
454 Biology and Evolution*, 24(8):1586–1591.
- 455 Yang, Z. and dos Reis, M. (2011). Statistical Properties of the Branch-Site Test of Positive  
456 Selection. *Molecular Biology and Evolution*, 28(3):1217–1228.
